# Supplementary material
Source: PubMed Central journal article supplement (PMC3672847)
Supplement: NIHMS50916-supplement-01.pdf [file NIHMS50916-supplement-01.pdf]

**Online Supporting Materials – Veena et al.**

**Veena et al., Supplemental Figure 1**

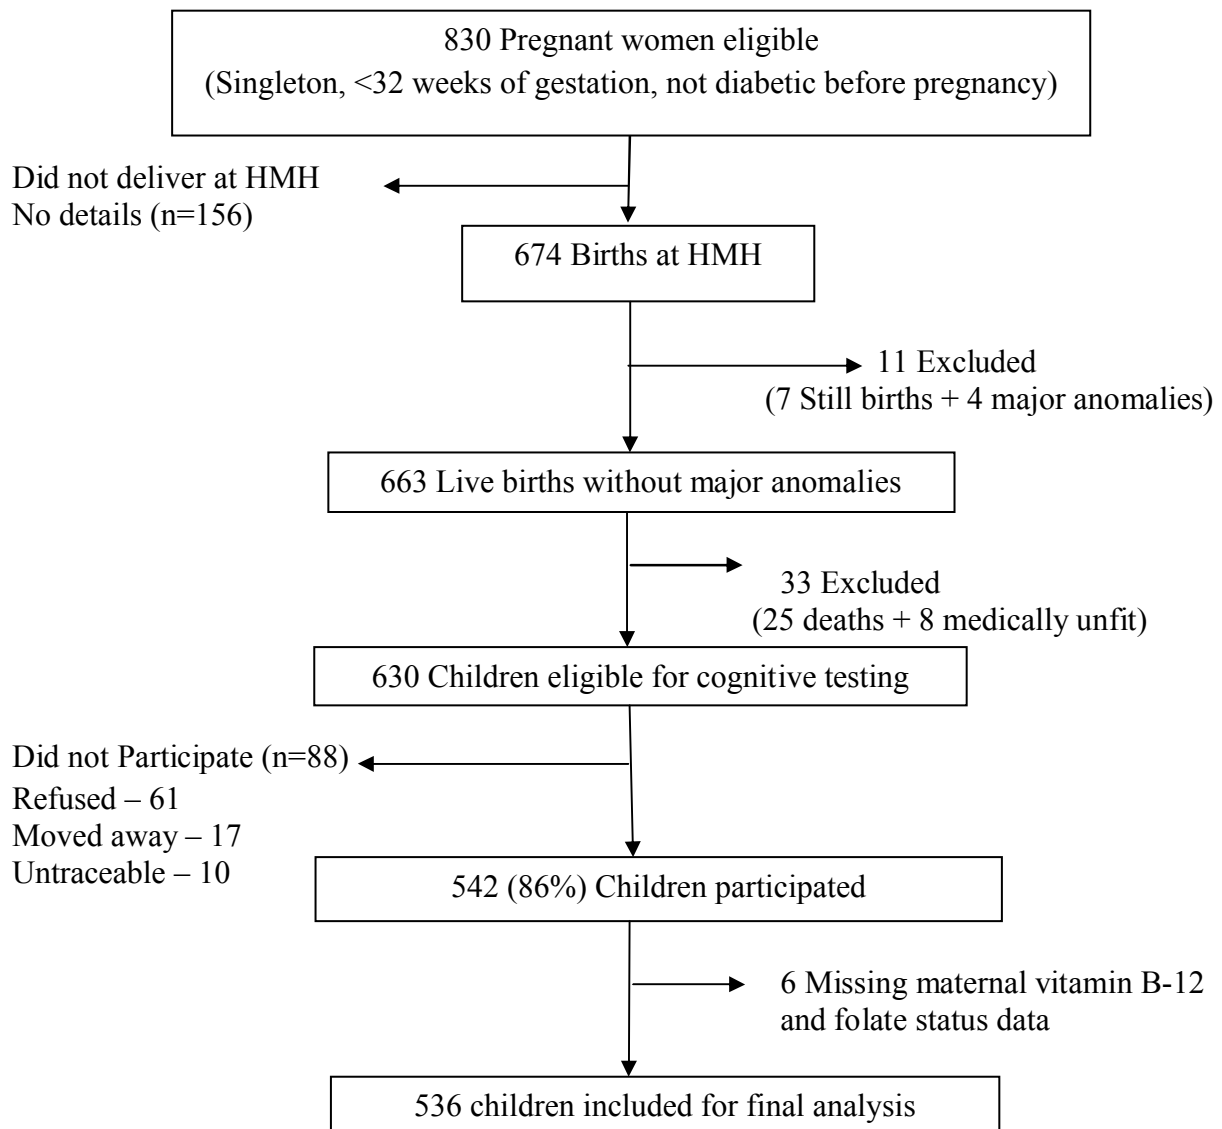

**Supplemental Figure 1: Flow chart of the study participants.**

**Online Supporting Materials – Veena et al.**

**Supplemental Table 1. Description of the cognitive tests used in the study**

| <b>Tests from KABC<sup>1</sup>-II</b>          |                                                                                                                                                                                                                               |                                                                                                                                         |
|------------------------------------------------|-------------------------------------------------------------------------------------------------------------------------------------------------------------------------------------------------------------------------------|-----------------------------------------------------------------------------------------------------------------------------------------|
| Name of the test                               | Description                                                                                                                                                                                                                   | Cognitive abilities                                                                                                                     |
| Atlantis                                       | The child is taught nonsense names for fish, plants and shells and is asked to point to the named object among an array of pictures                                                                                           | Learning ability/long-term storage and retrieval, associative memory                                                                    |
| Word order                                     | The child points to a series of silhouettes of common objects in the same order as mentioned by the examiner; an interference task (color naming) is added between the stimulus and the response for the more difficult items | Memory span, short term memory, working memory                                                                                          |
| Pattern Reasoning                              | The child completes a pattern by selecting the correct image from a set of 4 to 6 options shown; most stimuli are abstract, geometric shapes and the difficulty of the task increases as the test progresses.                 | Reasoning abilities such as induction and deduction and fluid reasoning                                                                 |
| <b>Additional tests</b>                        |                                                                                                                                                                                                                               |                                                                                                                                         |
| Verbal fluency<br>a) Animals<br>b) First names | The child is asked to name as many animals as possible in 1 minute and then asked to name as many first names as possible in 1 minute.                                                                                        | Broad retrieval ability; speed and flexibility of verbal thought process; neuropsychological test of language production                |
| Kohs block Design                              | A psychometric test in which the child arranges groups of 4, 9, or 16 multi-colored blocks to copy picture designs presented on test cards.                                                                                   | Visuo-spatial problem solving, visual perception and organization                                                                       |
| Coding-WISC-III <sup>2</sup>                   | The child has to substitute specific symbols for numbers presented in boxes, and complete as many items as possible in 2 minutes.                                                                                             | Visual-motor processing speed and coordination, short term memory, visual perception, visual scanning, cognitive flexibility, attention |

<sup>1</sup> Kaufman assessment battery for children-2<sup>nd</sup> edition

<sup>2</sup> Wechsler Intelligence Scale for Children-3<sup>rd</sup> edition
